Associations between reasons for vaping and current vaping and smoking status:

Evidence from a UK based cohort

Jasmine N. Khouja, MSc<sup>1, 2, 3</sup>, Amy E. Taylor, PhD<sup>2, 4</sup>, Marcus R. Munafò, PhD<sup>1, 3</sup>

<sup>1</sup> MRC Integrative Epidemiology Unit at the University of Bristol, United Kingdom.

<sup>2</sup> Bristol Medical School: Population Health Sciences, University of Bristol, United Kingdom.

<sup>3</sup> UK Centre for Tobacco and Alcohol Studies, School of Psychological Science, University of Bristol, United Kingdom.

<sup>4</sup> NIHR Biomedical Research Centre at the University Hospitals Bristol NHS Foundation Trust and the University of Bristol, United Kingdom.

**Corresponding author:** Jasmine N. Khouja, E: [jasmine.khouja@bristol.ac.uk](mailto:jasmine.khouja@bristol.ac.uk)

Keywords: ALSPAC; e-cigarettes; smoking

## ABSTRACT

### Introduction

Given the popularity of e-cigarettes, it is important to know who vapes, why, and whether different reasons for vaping are associated with vaping and smoking status.

### Methods

In a UK cohort of young adults (23-26 years), we explored the characteristics of vapers and whether different reasons for vaping were associated with later vaping and smoking status. We used multinomial logistic regression to assess the association among ever smokers and vapers.

### Results

Ever and never vapers differed in numerous demographic and behavioural characteristics. Vaping out of curiosity was associated with lower likelihood of being a current vaper (adjusted relative risk ratio [aRRR] = 0.26, 95% confidence interval [95%CI] = 0.12 to 0.57,  $p < 0.001$ ) but a higher likelihood of being a neither user compared to a current smoker at 24 years (aRRR = 2.13, 95%CI = 1.44 to 3.17,  $p < 0.001$ ). Vaping to quit smoking was associated with higher likelihood of being a dual user (aRRR = 3.21, 95%CI = 1.74 to 5.90,  $p < 0.001$ ) or a current vaper (aRRR = 3.26, 95%CI = 1.62 to 6.54,  $p < 0.001$ ) but a lower likelihood of being a neither user (aRRR = 0.53, 95%CI = 0.34 to 0.82,  $p = 0.004$ ) compared to being a current smoker at 24.

### Conclusions

Intention to quit smoking may be necessary for young people to effectively stop smoking using e-cigarettes.

### Implications

Although various studies have explored associations between reasons for vaping and both vaping and smoking, there is limited evidence from the UK. Particularly, evidence is limited among young

adults as most research either focusses on adolescents or older adults. Among young adults in the UK, curiosity is a common reason for vaping but intention to quit smoking may be necessary for young people to effectively stop smoking by vaping.

## INTRODUCTION

Of an estimated 2.9 million vapers in Great Britain, over half now consider themselves ex-smokers <sup>1</sup>. Evidence suggests e-cigarettes can be an effective smoking cessation aid <sup>2</sup>, but some smokers have not tried e-cigarettes, and not all who have tried them have successfully quit smoking <sup>3,4</sup>. Given the popularity of e-cigarettes, and the potential they have for population wide harm reduction, it is important to know which individuals use e-cigarettes, why, and whether different reasons for use are associated with continued use of e-cigarettes and smoking cessation.

A US study showed that vapers are more likely to be male than female and have a lower income <sup>5</sup>. Additionally, smokers and ex-smokers who had quit in the last 3 years were more likely to have used e-cigarettes than those who had never smoked, but a lower percentage of current and regular vapers were current smokers compared to ever vapers <sup>5</sup>. Studies of UK adults have produced similar results; current and non-current vapers differ in terms of socio-economic status, number of cigarettes smoked per day and quit attempts in the last year <sup>6</sup>. However, there is limited research which has explored whether these differences are also observable among young adults in the UK.

Among adults in Great Britain, the primary reasons for vaping are related to smoking cessation <sup>1</sup>. However, young adults in Great Britain may have different reasons for vaping than older adults; evidence from the US suggests that adolescents and young adults vape primarily out of curiosity <sup>7</sup> or because their friends/family vape <sup>8</sup>. In a study of South Korean adolescents, the most common reason for vaping among infrequent users was out of curiosity, but the most common reasons given for frequent vaping were to quit smoking and being able to vape indoors <sup>9</sup>. Vaping to quit smoking was also associated with continued vaping among US middle and high school students <sup>10</sup>. Although a number of studies have explored associations between reasons for vaping and both vaping and smoking, there is limited evidence from the UK. Furthermore, young adults are an understudied subgroup in this research area with most research either focussing on adolescents or older adults.

The aim of the present study was to explore the characteristics of young adults who are vaping or have previously vaped, and whether different reasons for vaping are associated with later vaping and smoking behaviours among ever smokers and ever vapers. Specifically, among a UK cohort of young adults are different reasons for vaping by 23 years associated with vaping and/or smoking one year later?

## **METHODS**

### **Study Population**

Young people enrolled in the Avon Longitudinal Study of Parents and Children (ALSPAC) formed the study sample. The profile of the cohort has previously been described in two publications<sup>11,12</sup>. ALSPAC recruited 14,541 pregnant women resident in Avon, UK with expected dates of delivery 1<sup>st</sup> April 1991 to 31<sup>st</sup> December 1992. When the oldest children were approximately 7 years of age, an attempt was made to bolster the initial sample with eligible cases who had failed to join the study originally. Consequently, for some variables measured at age 7 and onwards, there are data for more than the 14,541 pregnancies stated above. The number of new pregnancies not in the initial sample (known as Phase I enrolment) and that were currently enrolled in the study at the age of 24 was 913 (456, 262 and 195 recruited during Phases II, III and IV respectively). The phases of enrolment are described in more detail in the cohort profile update<sup>13</sup>. The total sample size for analyses using any data collected after the age of seven is therefore 15,454 pregnancies, resulting in 15,589 fetuses (Figure 1). Of these, 14,901 were alive at 1 year of age. Please note that the study website contains details of all the data that is available through a fully searchable data dictionary and variable search tool (<http://www.bristol.ac.uk/alspac/researchers/our-data/>).

The questionnaires on vaping and smoking at 23+ years were completed by 4,102 children (from here on in described as young people) and 3,241 of these also completed the questionnaires at 24+ years. The 23+ questionnaire was completed by the young people between the ages of 23 and 25 and the 24+ questionnaire was completed roughly a year later when the young people were

between 24 and 26 years. For ease, we will refer to these time points as 23 years and 24 years respectively. Figure 1 displays the recruitment process in detail.

ALSPAC study data from 22 years onwards were collected and managed using REDCap electronic data capture tools hosted at the University of Bristol <sup>14</sup>. REDCap (Research Electronic Data Capture) is a secure, web-based application designed to support data capture for research studies.

Ethics approval for the study was obtained from the ALSPAC Ethics and Law Committee and the Local Research Ethics Committees. Informed consent for the use of data collected via questionnaires and clinics was obtained from participants following the recommendations of the ALSPAC Ethics and Law Committee at the time.

## **Measures**

### *Exposure*

In a multiple-choice question at 23 years, respondents were instructed to cross all answers that applied for their reasons for vaping. Seven response options were available: “To help me quit smoking”, “To help me cut down on the number of cigarettes I smoke”, “To help me with cravings in situations where I cannot smoke e.g. travel, indoors”, “Pleasure”, “Curiosity”, “Friends use them” and “Other”. The “Other” option was not included in this analysis.

Supplementary Table 1 presents all questions together with possible response options.

### *Outcome*

At 24 years, e-cigarette outcome data was collected via questionnaire on current vaping. Current vaping was self-reported by the respondent in response to the question “Do you currently use/vape e-cigarettes or other vaping devices?” To determine smoking status at 24 years, the young people were asked “Have you smoked any cigarettes in the past 30 days?”

Secondary analyses were also completed in which the outcome was the highest generation of vaping device they had ever used by 24 years. Information regarding this outcome and the results of this analysis can be found in the Supplementary material.

### *Potential confounders*

Various behavioural, lifestyle and demographic factors were measured as well as factors relating to mental health. These factors have previously been shown to impact the likelihood of vaping and smoking and could potentially influence the reason given for vaping<sup>15-24</sup>. Sex was recorded at birth. Socioeconomic position (SEP; assessed via parental occupational status) and maternal smoking in pregnancy were recorded at 18 weeks gestation. Ethnicity was recorded at 32 weeks gestation. Body mass index was measured in clinic at 17 years. Drug use (alcohol, tobacco, marijuana and other drugs) and gambling were measured at 20 years. Condom use, education/employment status, and parenthood status (i.e., whether the young person had become a parent or not) were measured at 21 years. Mental health factors, measured at 21 years, were anxiety (GAD-7) and depressed mood in the past 4 weeks. Factors relating to vaping and smoking were measured at 23 and 24 years. Further information regarding these covariates can be found in the Supplementary Material.

## **Statistical Analysis**

### *Differences in participant characteristics*

Differences between never and ever vapers as well as never, former and current vapers were assessed using a  $\chi^2$  test.

### *Reasons for e-cigarette use and smoking/vaping behaviour*

In a series of multinomial logistic regressions, we explored the association between reasons for vaping by 23 years and vaping and smoking status at 24 years. Each of the six reasons for vaping were analysed individually as a binary variable (indicated/not indicated as a reason for use). Vaping and smoking status was categorised into four groups: current smoker (smoking but not currently

vaping), dual user (both vaping and smoking currently), current vaper (vaping but not currently smoking), or neither (not currently vaping nor smoking). Model 1 was unadjusted, model 2 adjusted for demographic factors (sex, ethnicity, SEP, and age in months at 23 year questionnaire) and model 3 adjusted for all demographic, behavioural, lifestyle and mental health factors. Details of the secondary analysis exploring reasons for vaping at 23 and the type of device used by 24 are provided in the Supplementary Material.

#### *Multiple imputation*

Only 20% of the young people who completed the questionnaire on vaping at 23 years and stated they had ever vaped and ever smoked also had complete data (including all covariates), so we used multiple imputation to increase the sample size available for analysis and minimise bias due to attrition. Models 2 and 3 were repeated using multiply imputed data (models 4 and 5 respectively). Multiple imputation is a recommended method to account for missing data<sup>25</sup>. The multiple imputation by chained equations procedure was completed using the ICE package in Stata 15.1 which created 100 datasets with 20 cycles. Data were imputed for the 668 young people who completed the questionnaires at 23 and 24 years and responded that they had ever smoked and ever used an e-cigarette. Further details of how the data were imputed, including the auxiliary variables used, can be found in Supplementary Table 2.

#### *Minimum detectable effect*

A power calculation revealed that we had sufficient power (90%) to detect a minimum odds ratio of 1.67. The calculation assumed a two-tailed hypothesis ( $\alpha=0.05$ ) and was based on a logistic regression of vaping to quit smoking by 23 years and vaping and smoking status (current smoking versus dual use) at 24 years. Of 242 young people who had not vaped to quit smoking, 216 were smokers and 26 were dual users at 24 years. Therefore, the calculation was based on an 11% probability of an event in the control group.



## RESULTS

### Characteristics of Vapers at Age 23

The characteristics of the young people are described in Table 1, grouped into never vapers (n = 3,013), and ever vapers (n = 981); ever vapers were also grouped into former vapers (n = 814) and current vapers (n = 167). A higher percentage of ever vapers were male, of lower SEP (parental), had a mother who smoked in pregnancy, were harmful or hazardous drinkers and had ever used drugs or gambled than never vapers. Ever vapers were also more likely to report anxiety or depressed mood, smoking by the age of 20 or 23 years, and be current, weekly or daily smokers than never vapers at 23 years. Vaping among never smokers was rare; only 5% of ALSPAC participants who had ever vaped had never smoked, and less than 1% of ever vapers defined themselves as a current vaper who had never smoked at 23 years. There were no clear differences between these groups in terms of ethnicity, BMI, unemployment or parenthood. On average, participants were 23 years old across all groups at the initial questionnaire. Supplementary Table 3 shows these characteristics for never vapers and the former and current vapers who were included in the final analysis.

### Reasons for Vaping

Participants' reasons for vaping by 23 years are shown in Table 2. Current vapers were more likely than former vapers to vape for all reasons except 'out of curiosity', the most popular reason given for ever vaping (51%). Most young people (56%) selected only one reason for vaping (Supplementary Table 4).

### *Reasons for vaping and smoking/vaping behaviour*

Due to small numbers of never smokers who had tried vaping at 23 years (n = 47), analyses were restricted to ever-smokers. The study sample consisted of 668 young people who had completed both questionnaires and had ever vaped by 23 years. The median time between questionnaire completion at 23 years and 24 years was 12 months. The age at which the young people first vaped

ranged from 17 to 24 years (SD = 1; median = 22) and on average occurred 2 years before questionnaire completion. Supplementary Table 5 displays vaping characteristics for vapers at 23. At 24 years, 49% of the young people (n = 330) were current smokers who were not currently vaping. Dual use (n = 62) and current vaping (n = 47) were less common. A substantial proportion of the young people were neither users at 24 years (n = 229).

The results for the unimputed models (Models 1-3) are shown in Supplementary Table 6 and the results for the imputed models (Models 4-5) are shown in Table 3. The results were broadly consistent, with all associations in the same direction with a similar magnitude but the confidence intervals were narrower in the unadjusted and multiply imputed analyses.

Vaping to quit smoking at age 23 was associated with higher likelihood of being a dual user (imputed adjusted relative risk ratio [aRRR] = 3.21, 95% confidence interval [95%CI] = 1.74 to 5.90,  $p < 0.001$ ) or a current vaper at 24 (aRRR = 3.26, 95%CI = 1.62 to 6.54,  $p < 0.001$ ) but a lower likelihood of being a neither user at 24 (aRRR = 0.53, 95%CI = 0.34 to 0.82,  $p = 0.004$ ) compared to being a current smoker. Vaping to cut down by age 23 was associated with higher likelihood of being a dual user (aRRR = 3.70, 95%CI = 1.99 to 6.87,  $p < 0.001$ ) but a lower likelihood of being a neither user (aRRR = 0.29, 95%CI = 0.17 to 0.49,  $p < 0.001$ ) than a current smoker at 24. Vaping to curb cravings by age 23 was associated with higher likelihood of being a dual user (aRRR = 6.17, 95%CI = 3.03 to 12.60,  $p < 0.001$ ) and a current vaper at 24 years rather than a smoker (aRRR = 2.46, 95%CI = 0.98 to 6.17,  $p = 0.055$ ). Vaping for pleasure by age 23 was associated with higher likelihood of being a dual user (aRRR = 4.17, 95%CI = 2.16 to 8.08,  $p < 0.001$ ) and being a current vaper rather than a current smoker at 24 years (aRRR = 3.48, 95%CI = 1.62 to 7.49,  $p = 0.001$ ). Vaping out of curiosity by age 23 was associated with a lower likelihood of being a current vaper (aRRR = 0.26, 95%CI = 0.12 to 0.57,  $p < 0.001$ ) but a higher likelihood of being a neither user compared to a current smoker at 24 years (aRRR = 2.13, 95%CI = 1.44 to 3.17,  $p < 0.001$ ).

*Reasons for vaping and device type used*

Results of the secondary analysis exploring reasons for vaping at 23 and the type of device used by 24 are provided in the Supplementary Material and shown in Supplementary Tables 7 and 8). Vaping to cut down smoking and for pleasure was associated with 3<sup>rd</sup> generation e-cigarette use rather than 1<sup>st</sup> generation (aRRR = 4.08, 95%CI 1.30 to 12.80,  $p = 0.016$ ; aRRR = 4.84, 95%CI 1.09 to 21.63,  $p = 0.038$  respectively).

## DISCUSSION

The results indicate that there are substantial differences in characteristics between young people who have never and ever vaped at 23. Vaping out of curiosity and to quit smoking were common reasons for vaping among young people in this UK-based sample. Five out of the six reasons for vaping by 23 years included in this study were strongly associated with vaping and smoking status at 24 years. Identifying the factors which influence vaping among young people could be key to understanding why some young people effectively use e-cigarettes to quit smoking and others do not. Additionally, different reasons for vaping could provide insight into why some young people experiment with e-cigarettes and some continue to vape.

Similar to previous findings<sup>6</sup>, we found that vapers were more likely to have a lower SEP than never vapers. Vapers were also more likely to report risk taking behaviours such as drug use and gambling and were more likely to report mental health issues. Smoking has previously been associated with similar characteristics<sup>15,17,24,26</sup>. Smoking could mediate the relationship between these factors and vaping; most vapers smoke prior to vaping and some start vaping to help them quit smoking (as shown in this study). In line with previous findings<sup>5</sup>, vapers were more likely to be ever, weekly or daily smokers at 23 years, and vaping among never smokers was rare. However, given that 52% of the sample did not provide a smoking-related reason for vaping and that we are unable to determine order of product use for all participants, the similarity in characteristics could be due to vaping leading some individuals to start smoking rather than leading them to quit. Alternatively, the similarity could indicate that there is a common liability for both behaviours (i.e., the same factors

increase the likelihood of engaging in both behaviours). This could explain why not all young people who vape go on to quit smoking.

Our results imply that vaping to quit smoking may facilitate young people's quit attempts as those who were vaping for this reason were more likely to be e-cigarette only users rather than current smokers at 24. Previous research has also found that vaping to quit was associated with continued vaping among middle and high school students<sup>10</sup> and college students in the US<sup>27</sup>. However, vaping to quit smoking could also encourage the continued use of e-cigarettes rather than quitting nicotine products entirely as these individuals were more likely to be dual users than smokers and more likely to be smokers than neither users at 24 years. If these people aim to be completely nicotine free, they may need additional help to quit vaping or reduce the levels of nicotine in their e-liquid once they have successfully quit smoking.

Although vaping to cut down smoking is similar in terms of motive, the associated behaviour was slightly different from vaping to quit smoking. These users were more likely to be dual users than current smokers but more likely to be current smokers than using neither product. There was no clear association with being a current vaper suggesting that these users are potentially less likely to quit smoking. Logically, this could be due to the users having no intention to quit smoking all together or, because this study was over a relatively short time period, these users may still be in the process of cutting down and may eventually quit completely.

Consistent with previous research conducted in the US, we found that curiosity is the most common reason for vaping among young people<sup>7</sup>. Interestingly, young people were more likely to be current smokers than current vapers at 24 if they had vaped out of curiosity but were less likely to be current smokers than neither users. As the sample are *ever* smokers who have *ever* vaped, this may highlight a group of 'experimenters' who try both vaping and smoking but do not continue either behaviour. For those who had smoked less than 100 cigarettes in their lifetime, curiosity was a

common reason for use in a study of young adults in the US<sup>28</sup> which supports our interpretation of this result. Additionally, this result implies that smokers who vape out of curiosity don't want to or are unable to quit smoking.

These results provide strong evidence for associations between reasons for e-cigarette use and later vaping and smoking status using a large UK-based young adult cohort while adjusting for a range of potential confounders. However, the study was limited by the measures included. The reasons for vaping were self-reported retrospectively. Consequently, the measure could suffer from recall bias (e.g. young people may be less likely to state that they vaped to quit smoking if they were unsuccessful in their quit attempt). Also, the reasons for vaping chosen were not exclusive for each young person due to the multiple-choice format of this question. As with many previous studies, a multiple-choice item was used to determine reasons for vaping where open questions and qualitative analysis may have uncovered other potential reasons for vaping which are omitted from this analysis. The young people were also provided with an 'other' option in the questionnaire where they could provide open answer responses, however, this was rarely selected (4% of the sample) or selected without another reason being selected (2%) so was not included in the analysis.

The timing of this cohort study may impact the generalisability of the findings. E-cigarettes are still a relatively new product compared to cigarettes; consequently, cigarettes were available to this cohort of young adults for a considerable period of their adolescence before e-cigarettes became widely available in 2007. In 2007, the study sample were roughly 17 years old and cigarette initiation has been shown to peak at around 15-16 years of age<sup>29</sup>, so it is likely that these young people experimented with cigarettes prior to being exposed to e-cigarettes. Young people today are being exposed to both e-cigarettes and cigarettes during adolescence, a key period for experimentation and risk-taking behaviour, and this may have an impact on their reasons for vaping as well as their current vaping and smoking status. Although it would be interesting to observe the association

between reasons for vaping and current vaping and smoking status among those who were never smokers when they first tried vaping, we are unable to identify these individuals with the current available data at 23 years. Similarly, it would also be interesting to observe the associations among never smokers at 23 years but there are too few individuals who have vaped but never smoked at 23 to report any meaningful analysis.

In conclusion, vapers and never vapers differed in socio-demographic and smoking characteristics, and reasons for vaping are associated with later vaping and smoking status. Intention to quit smoking may be necessary for young adults to effectively stop smoking using e-cigarettes.

## **Funding**

This publication is the work of the authors and JK, AT and MM will serve as guarantors for the contents of this paper. J.K and M.M are members of the UK Centre for Tobacco and Alcohol Studies, a UKCRC Public Health Research: Centre of Excellence. Funding from British Heart Foundation, Cancer Research UK, Economic and Social Research Council, Medical Research Council, and the National Institute for Health Research, under the auspices of the UK Clinical Research Collaboration, is gratefully acknowledged. This work was supported by the Medical Research Centre Integrative Epidemiology Unit at the University of Bristol [grant number MC\_UU\_0011/7]. The UK Medical Research Council and Wellcome (Grant ref: 102215/2/13/2) and the University of Bristol provide core support for ALSPAC. A comprehensive list of grants funding is available on the ALSPAC website (<http://www.bristol.ac.uk/alspac/external/documents/grant-acknowledgements.pdf>). This work was also supported by CRUK (grant numbers C18281/A19169 and C57854/A22171), Wellcome Trust and the UK Medical Research Council (grant number: 092731).

## **Competing Interests**

The authors have no conflicts of interest to declare.

## **Acknowledgements**

We are extremely grateful to all the families who took part in this study, the midwives for their help in recruiting them, and the whole ALSPAC team, which includes interviewers, computer and laboratory technicians, clerical workers, research scientists, volunteers, managers, receptionists and nurses.

## REFERENCES

1. Action on Smoking and Health. *Use of e-cigarettes (vapourisers) among adults in Great Britain*. 2017.
2. Hajek P, Phillips-Waller A, Przulj D, et al. A Randomized Trial of E-Cigarettes versus Nicotine-Replacement Therapy. *New Engl J Med*. 2019;380(7):629-637.
3. Zhu SH, Zhuang YL, Wong SS, Cummins SE, Tedeschi GJ. E-cigarette use and associated changes in population smoking cessation: evidence from US current population surveys. *Bmj-Brit Med J*. 2017;358.
4. Hartmann-Boyce J, McRobbie H, Bullen C, Begh R, Stead LF, Hajek P. Electronic cigarettes for smoking cessation. *Cochrane Database of Systematic Reviews*. 2016(9).
5. Levy DT, Yuan Z, Li Y. The Prevalence and Characteristics of E-Cigarette Users in the U.S. *Int J Environ Res Public Health*. 2017;14(10).
6. Brown J, West R, Beard E, Michie S, Shahab L, McNeill A. Prevalence and characteristics of e-cigarette users in Great Britain: Findings from a general population survey of smokers. *Addict Behav*. 2014;39(6):1120-1125.
7. Kong G, Morean ME, Cavallo DA, Camenga DR, Krishnan-Sarin S. Reasons for Electronic Cigarette Experimentation and Discontinuation Among Adolescents and Young Adults. *Nicotine Tob Res*. 2015;17(7):847-854.
8. Tsai J, Walton K, Coleman BN, et al. Reasons for Electronic Cigarette Use Among Middle and High School Students - National Youth Tobacco Survey, United States, 2016. *Mmwr-Morbid Mortal W*. 2018;67(6):196-200.
9. Lee JA, Lee S, Cho HJ. The Relation between Frequency of E-Cigarette Use and Frequency and Intensity of Cigarette Smoking among South Korean Adolescents. In: *Int J Environ Res Public Health*. Vol 14.2017.
10. Bold KW, Kong G, Cavallo DA, Camenga DR, Krishnan-Sarin S. Reasons for Trying E-cigarettes and Risk of Continued Use. *Pediatrics*. 2016;138(3).
11. Boyd A, Golding J, Macleod J, et al. Cohort Profile: The 'Children of the 90s'-the index offspring of the Avon Longitudinal Study of Parents and Children. *Int J Epidemiol*. 2013;42(1):111-127.
12. Fraser A, Macdonald-Wallis C, Tilling K, et al. Cohort Profile: The Avon Longitudinal Study of Parents and Children: ALSPAC mothers cohort. *Int J Epidemiol*. 2013;42(1):97-110.
13. Northstone K, Lewcock M, Groom A, et al. The Avon Longitudinal Study of Parents and Children (ALSPAC): an update on the enrolled sample of index children in 2019. *Wellcome Open Res*. 2019;4(51).
14. Harris PA, Taylor R, Thielke R, Payne J, Gonzalez N, Conde JG. Research electronic data capture (REDCap)--a metadata-driven methodology and workflow process for providing translational research informatics support. *J Biomed Inform*. 2009;42(2):377-381.
15. Jamal A, King BA, Neff LJ, Whitmill J, Babb SD, Graffunder CM. Current Cigarette Smoking Among Adults - United States, 2005-2015. *Mmwr-Morbid Mortal W*. 2016;65(44):1205-1211.
16. Hedman L, Backman H, Stridsman C, et al. Association of Electronic Cigarette Use With Smoking Habits, Demographic Factors, and Respiratory Symptoms. *Jama Netw Open*. 2018;1(3).
17. Hiscock R, Bauld L, Amos A, Fidler JA, Munafo M. Socioeconomic status and smoking: a review. *Ann Ny Acad Sci*. 2012;1248:107-123.
18. Hartwell G, Thomas S, Egan M, Gilmore A, Petticrew M. E-cigarettes and equity: a systematic review of differences in awareness and use between sociodemographic groups. *Tob Control*. 2017;26(E2):e85-e91.
19. Taylor AE, Howe LD, Heron JE, Ware JJ, Hickman M, Munafo MR. Maternal smoking during pregnancy and offspring smoking initiation: assessing the role of intrauterine exposure. *Addiction*. 2014;109(6):1013-1021.



20. Karlsen S, Millward D, Sandford A. Investigating ethnic differences in current cigarette smoking over time using the health surveys for England. *Eur J Public Health*. 2012;22(2):254-256.
21. Dare S, Mackay DF, Pell JP. Relationship between Smoking and Obesity: A Cross-Sectional Study of 499,504 Middle-Aged Adults in the UK General Population. *Plos One*. 2015;10(4).
22. Grant JE, Lust K, Fridberg DJ, King AC, Chamberlain SR. E-cigarette use (vaping) is associated with illicit drug use, mental health problems, and impulsivity in university students. *Ann Clin Psychiatry*. 2019;31(1):27-35.
23. Jarvis MJ. The association between having children family size and smoking cessation in adults. *Addiction*. 1996;91(3):427-434.
24. Minichino A, Bersani FS, Calo WK, et al. Smoking Behaviour and Mental Health Disorders- Mutual Influences and Implications for Therapy. *Int J Env Res Pub He*. 2013;10(10):4790-4811.
25. Sterne JA, White IR, Carlin JB, et al. Multiple imputation for missing data in epidemiological and clinical research: potential and pitfalls. *BMJ*. 2009;338:b2393.
26. Lai SH, Lai H, Page JB, McCoy CB. The association between cigarette smoking and drug abuse in the United States. *J Addict Dis*. 2000;19(4):11-24.
27. Saddleson ML, Kozlowski LT, Giovino GA, et al. Enjoyment and other reasons for electronic cigarette use: Results from college students in New York. *Addictive Behaviors*. 2016;54:33-39.
28. Biener L, Song E, Sutfin EL, Spangler J, Wolfson M. Electronic Cigarette Trial and Use among Young Adults: Reasons for Trial and Cessation of Vaping. *Int J Env Res Pub He*. 2015;12(12):16019-16026.
29. Marcon A, Pesce G, Calciano L, et al. Trends in smoking initiation in Europe over 40 years: A retrospective cohort study. *Plos One*. 2018;13(8).

Table 1. Characteristics of the study population for never, former and current e-cigarette users at 23 years (N = 3,994).

| Characteristic                  | Never vapers<br>(n = 3,013)<br>N (%*) | Ever vapers<br>(n = 981)<br>N (%*) | Ever vapers                             |                                          | p-value<br>(Never vs ever/<br>never vs former<br>vs current) |
|---------------------------------|---------------------------------------|------------------------------------|-----------------------------------------|------------------------------------------|--------------------------------------------------------------|
|                                 |                                       |                                    | Former<br>vapers<br>(n = 814)<br>N (%*) | Current<br>vapers<br>(n = 167)<br>N (%*) |                                                              |
| Female                          | 2005 (67%)                            | 599 (61%)                          | 502 (62%)                               | 97 (58%)                                 | .002 / .005                                                  |
| Parental SEP (manual)           | 1005 (38%)                            | 372 (43%)                          | 297 (42%)                               | 75 (50%)                                 | .007 / .005                                                  |
| Ancestry (non-European)         | 116 (4%)                              | 33 (4%)                            | 26 (4%)                                 | 7 (5%)                                   | .51 / .66                                                    |
| Mother smoked in pregnancy      | 380 (13%)                             | 205 (22%)                          | 165 (22%)                               | 40 (25%)                                 | <.001 / <.001                                                |
| Harmful/hazardous alcohol use   | 1033 (49%)                            | 401 (67%)                          | 348 (69%)                               | 53 (55%)                                 | <.001 / <.001                                                |
| Cannabis use (ever)             | 923 (41%)                             | 505 (80%)                          | 424 (80%)                               | 81 (79%)                                 | <.001 / <.001                                                |
| Other drug use (ever)           | 401 (18%)                             | 299 (50%)                          | 255 (51%)                               | 44 (46%)                                 | <.001 / <.001                                                |
| Gambled (ever)                  | 322 (15%)                             | 143 (24%)                          | 117 (23%)                               | 26 (26%)                                 | <.001 / <.001                                                |
| Anxiety                         | 730 (36%)                             | 280 (52%)                          | 229 (51%)                               | 51 (62%)                                 | <.001 / <.001                                                |
| Depressed mood                  | 1269 (63%)                            | 381 (73%)                          | 321 (72%)                               | 60 (74%)                                 | <.001 / <.001                                                |
| Overweight/obese BMI            | 420 (17%)                             | 150 (19%)                          | 122 (19%)                               | 28 (23%)                                 | .087 / .12                                                   |
| Unemployment status             | 151 (7%)                              | 44 (8%)                            | 37 (8%)                                 | 7 (9%)                                   | .43 / .72                                                    |
| Parenthood status (had a child) | 91 (4%)                               | 32 (6%)                            | 24 (5%)                                 | 8 (10%)                                  | .14 / .069                                                   |
| Ever smoked by 23 years         | 1467 (49%)                            | 932 (95%)                          | 767 (94%)                               | 165 (99%)                                | <.001 / <.001                                                |
| Current smoker at 23 years      | 355 (12%)                             | 617 (63%)                          | 510 (63%)                               | 107 (64%)                                | <.001 / <.001                                                |
| Weekly smoker at 23 years**     | 58 (28%)                              | 111 (39%)                          | 89 (37%)                                | 22 (44%)                                 | .012 / .029                                                  |
| Daily smoker at 23 years**      | 150 (42%)                             | 335 (54%)                          | 277 (54%)                               | 58 (55%)                                 | <.001 / <.001                                                |
|                                 | Mean (SD)                             | Mean (SD)                          | Mean (SD)                               | Mean (SD)                                |                                                              |
| Age (initial questionnaire)     | 23.9 (0.5)                            | 23.9 (0.5)                         | 23.9 (0.5)                              | 23.8 (0.5)                               |                                                              |

\*Due to missing data, the percentage of users refers to the number of participant/participants who responded. \*\*Only current smokers were asked this question. SEP = Socioeconomic position. The highest socioeconomic position of the mother or father was coded as manual vs non-manual occupation. Harmful/hazardous alcohol use was defined as a score of 8 or more on the Alcohol Use Disorders Identification Test (AUDIT). Anxiety was defined as scores of 5 or more on the GAD-7 which indicated mild to severe anxiety. Depressed mood was defined as feeling downhearted and depressed in the last 4 weeks and was not an indicator of clinical diagnosis. Unemployment status was defined as not currently being employed or engaging in any form of full or part-time education or training. Differences between never and ever vapers as well as never, former and current vapers were assessed using  $\chi^2$ .

Table 2. Reasons for e-cigarette use among former and current vapers by 23 years (N = 981).

| Reasons for vaping by 23                                       | Former    | Current   | <i>p</i> -value |
|----------------------------------------------------------------|-----------|-----------|-----------------|
|                                                                | vapers    | vapers    |                 |
|                                                                | (n = 814) | (n = 167) |                 |
|                                                                | N (%)     | N (%)     |                 |
| Vaped to quit smoking                                          | 222 (27%) | 113 (68%) | <0.001          |
| Vaped to cut down number of cigarettes smoked                  | 161 (20%) | 68 (41%)  | <0.001          |
| Vaped to help with cravings in situations when unable to smoke | 64 (8%)   | 8 (25%)   | <0.001          |
| Vaped for pleasure                                             | 119 (15%) | 54 (32%)  | <0.001          |
| Vaped out of curiosity                                         | 469 (58%) | 32 (19%)  | <0.001          |
| Vaped because friends used them                                | 186 (23%) | 22 (13%)  | 0.005           |

Table 3. Associations between reasons for vaping by 23 years and vaping and smoking at 24 years among ever smokers and ever vapers.

| Reason for e-cigarette use<br>Smoking/vaping behaviour | n<br>(Yes/No) | Model 4 (n=668) |             |       | Model 5 (n=668) |             |       |
|--------------------------------------------------------|---------------|-----------------|-------------|-------|-----------------|-------------|-------|
|                                                        |               | aRRR            | 95% CI      | p     | aRRR            | 95% CI      | p     |
| To quit                                                | 228/440       |                 |             |       |                 |             |       |
| Current smoker                                         | 114/216       | 1               | (ref)       | (ref) | 1               | (ref)       | (ref) |
| Current dual user                                      | 36/26         | 2.74            | 1.57, 4.78  | <.001 | 3.21            | 1.74, 5.90  | <.001 |
| Current vaper                                          | 28/19         | 2.82            | 1.50, 5.31  | .001  | 3.26            | 1.62, 6.54  | <.001 |
| Neither user                                           | 50/179        | 0.53            | 0.36, 0.78  | .001  | 0.53            | 0.34, 0.82  | .004  |
| To cut down                                            | 166/502       |                 |             |       |                 |             |       |
| Current smoker                                         | 95/235        | 1               | (ref)       | (ref) | 1               | (ref)       | (ref) |
| Current dual user                                      | 35/27         | 3.35            | 1.90, 5.92  | <.001 | 3.70            | 1.99, 6.87  | <.001 |
| Current vaper                                          | 12/35         | 0.87            | 0.43, 1.76  | .69   | 0.87            | 0.41, 1.85  | 0.71  |
| Neither user                                           | 24/205        | 0.29            | 0.18, 0.47  | <.001 | 0.29            | 0.17, 0.49  | <.001 |
| To curb cravings                                       | 75/593        |                 |             |       |                 |             |       |
| Current smoker                                         | 30/300        | 1               | (ref)       | (ref) | 1               | (ref)       | (ref) |
| Current dual user                                      | 44/18         | 5.66            | 2.94, 10.90 | <.001 | 6.17            | 3.03, 12.60 | <.001 |
| Current vaper                                          | 8/39          | 2.00            | 0.84, 4.73  | .12   | 2.46            | 0.98, 6.17  | .055  |
| Neither user                                           | 14/215        | 0.70            | 0.37, 1.35  | .29   | 0.87            | 0.43, 1.74  | .69   |
| Pleasure                                               | 118/550       |                 |             |       |                 |             |       |
| Current smoker                                         | 40/290        | 1               | (ref)       | (ref) | 1               | (ref)       | (ref) |
| Current dual user                                      | 23/39         | 4.27            | 2.29, 7.98  | <.001 | 4.17            | 2.16, 8.08  | <.001 |
| Current vaper                                          | 15/32         | 3.35            | 1.64, 6.85  | .001  | 3.48            | 1.62, 7.49  | .001  |
| Neither user                                           | 40/189        | 1.51            | 0.93, 2.44  | .094  | 1.41            | 0.85, 2.36  | .19   |
| Curiosity                                              | 351/317       |                 |             |       |                 |             |       |
| Current smoker                                         | 163/167       | 1               | (ref)       | (ref) | 1               | (ref)       | (ref) |
| Current dual user                                      | 28/34         | 0.78            | 0.45, 1.37  | .39   | 0.76            | 0.43, 1.36  | .36   |
| Current vaper                                          | 10/37         | 0.28            | 0.13, 0.59  | <.001 | 0.26            | 0.12, 0.57  | <.001 |
| Neither user                                           | 150/79        | 1.94            | 1.36, 2.77  | <.001 | 2.13            | 1.44, 3.17  | <.001 |
| Friends used them                                      | 153/515       |                 |             |       |                 |             |       |
| Current smoker                                         | 78/252        | 1               | (ref)       | (ref) | 1               | (ref)       | (ref) |
| Current dual user                                      | 10/52         | 0.61            | 0.30, 1.27  | .19   | 0.55            | 0.25, 1.17  | .12   |
| Current vaper                                          | 8/39          | 0.70            | 0.31, 1.57  | .39   | 0.62            | 0.26, 1.47  | .27   |
| Neither user                                           | 57/172        | 1.06            | 0.72, 1.58  | .75   | 0.96            | 0.61, 1.50  | .85   |

The models were run on multiply imputed data for individuals who ever smoked and ever vaped. Model 4 adjusted for demographic factors (sex, ethnicity, socioeconomic position, and age in months at 23 year questionnaire). Model 5 adjusted for sex, ethnicity, socioeconomic position, age, maternal smoking in pregnancy, body mass index, drug use (alcohol, tobacco, marijuana and other drugs), gambling, condom use, education/employment status, parenthood status, anxiety and depressed mood in the past 4 weeks. Note: aRRR = adjusted relative risk ratio. Ref = reference category.

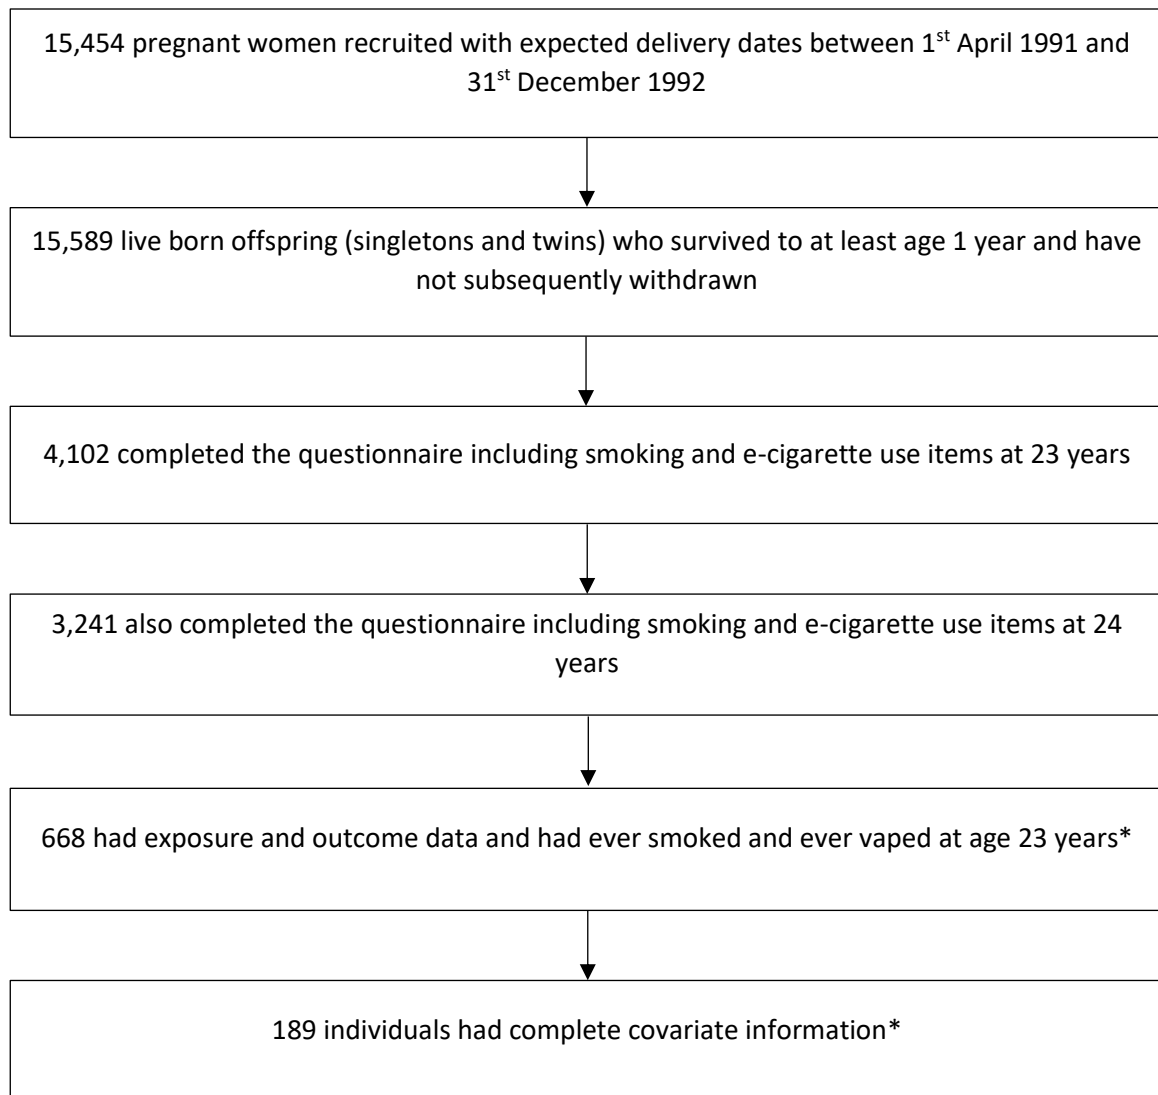

Figure 1. Flow chart depicting the process of data inclusion in the analysis of the associations between reasons for vaping at 23 years and vaping and smoking at 24 years.

\*Figures shown for vaping and smoking status outcomes, for devices type outcomes n= 509 and n= 146 respectively.
